# Supplementary material for: In situ growth of binder-free CoNi0.5-MOF/CC electrode for high-performance flexible solid-state supercapacitor application
Source: Royal Society of Chemistry journal article supplement (doi:10.1039/d3nr06225b), 2024-01-01
Supplement: d3nr06225b5.pdf [file d3nr06225b5.pdf]

## Supporting Information

### In-situ Growth of Binder-Free CoNi<sub>0.5</sub>-MOF/CC Electrode for High-Performance Flexible Solid-State Supercapacitor Application

Weijie Zhang<sup>#</sup>, Zhen Cao<sup>#</sup>, Yuying Li, Ruiting Li, Yanmei Zheng, Ping Su and

Xinli Guo<sup>\*</sup>

Dr. W.J Zhang

Chongqing Key laboratory of New Energy Storage Materials and Devices, School of Science, Chongqing University of Technology, Chongqing 40054, China

School of Materials Science and Engineering, Southeast University, Nanjing 211189, China

Dr. Z. Cao, Dr. Y. Y. Li, Dr. R.T. Li, Pro. X.L. Guo

School of Materials Science and Engineering, Southeast University, Nanjing 211189, China

Email: guo.xinli@seu.edu.cn

Dr. Y.M. Zheng

Jiangsu Co-Innovation Center of Efficient Processing and Utilization of Forest Resources, International Innovation Center for Forest Chemicals and Materials, College of Chemical Engineering, Nanjing Forestry University, Longpan Road 159, Nanjing 210037, China.

Dr. Ping Su

Chongqing Key laboratory of New Energy Storage Materials and Devices, School of Science, Chongqing University of Technology, Chongqing 40054, China

<sup>#</sup> These authors contribute equally

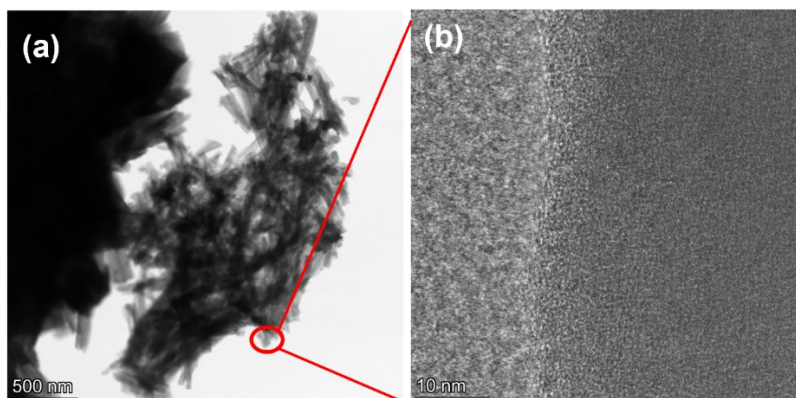

Figure S1 TEM image of CoNi<sub>0.5</sub>-MOF/CC with different magnification

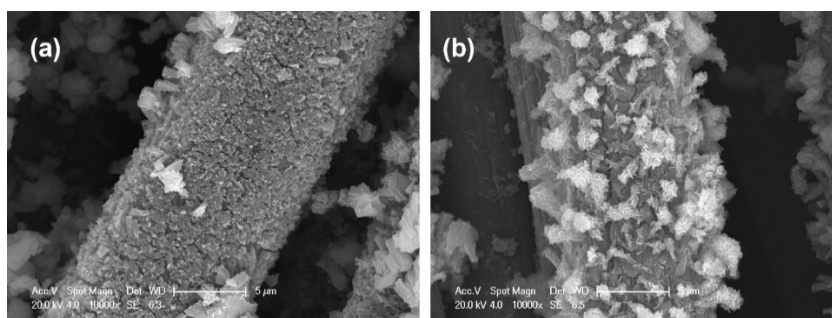

Figure S2 high resolution SEM image of CoNi<sub>0.5</sub>-MOF before and after 6000 cycles test

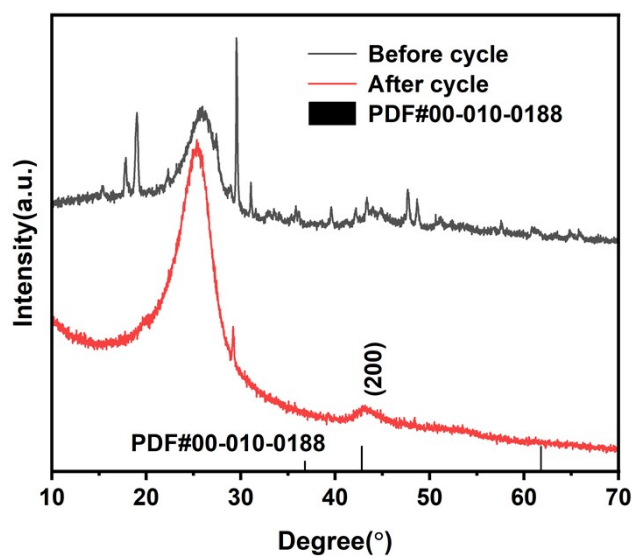

Figure S3 The XRD pattern of CoNi<sub>0.5</sub>-MOF/CC before and after cycle test

To evaluate the stability of the CoNi<sub>0.5</sub>-MOF structure during the electrochemical process, we fabricated electrodes and subjected them to 6000 cycles under a current density of 10 A g<sup>-1</sup>. Comparative analysis of the scanning electron microscopy (SEM) results indicates that while there were slight changes in the morphology of CoNi<sub>0.5</sub>-MOF due to expansion during the electrochemical process, the active material maintained good contact with the substrate without collapsing or detaching. This observation confirms the retention of cycle stability. Additionally, we examined the detailed structure of the electrode after cycling. Figure S3 illustrates that following electrochemical cycling, there were alterations in the lattice structure of CoNi<sub>0.5</sub>-MOF, with the disappearance of typical MOF peaks and the emergence of CoNiO<sub>2</sub> peaks. This transformation is likely attributed to the following electrochemical reactions occurring during cycling:

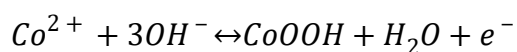

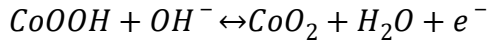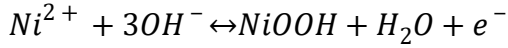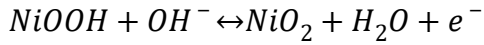

| Electrode Material                 | Capacitor  | Energy Density            | Power Density              | Reference |
|------------------------------------|------------|---------------------------|----------------------------|-----------|
| CoNi-MOF/AC                        | asymmetric | 35 Wh kg <sup>-1</sup>    | 1450 W kg <sup>-1</sup>    | 2         |
| Ni-MOF/AC                          | asymmetric | 30.4 Wh kg <sup>-1</sup>  | 407.4 W kg <sup>-1</sup>   | 3         |
| NiCo-LDH//AC                       | asymmetric | 50.5 Wh kg <sup>-1</sup>  | 750 W kg <sup>-1</sup>     | 4         |
| P-ZIF-67//AC                       | asymmetric | 19.7 Wh kg <sup>-1</sup>  | 500 W kg <sup>-1</sup>     | 5         |
| ZFO@NMO NSAs@rGO-NF//<br>MDHPC     | asymmetric | 58.6 Wh kg <sup>-1</sup>  | 799 W kg <sup>-1</sup>     | 6         |
| NiCo-MOF//(AC)                     | asymmetric | 45.3 Wh kg <sup>-1</sup>  | 847.8 W kg <sup>-1</sup>   | 7         |
| CoNi <sub>0.5</sub> -MOF/CC// N-Gr | asymmetric | 61.46 Wh kg <sup>-1</sup> | 1244.56 W kg <sup>-1</sup> | This work |

Table.S1 Comparison of the performance of CoNi<sub>0.5</sub>-MOF /CC// N-Gr asymmetric supercapacitors with other supercapacitors

#### Reference:

- [1] H. Y. Zhang, J.C. Wang, Y. Sun, X.Q. Zhang, H. Yang, B.P. Lin, *Journal of Alloys and Compounds*, 2021,879, 160423
- [2] S. K. Kim, Y. K. Kim, H. Lee, S. B. Lee and H. S. Park, *ChemSusChem*, 2014, 7, 1094-1101.
- [3] X. Chu, F. Meng, W. Zhang, H. Yang, X. Zou, S. Molin, P. Jasinski, X. Sun and W. Zheng, *Nanotechnology*, 2022, 33, 205403.
- [4] J. Wang, Y. Ma, X. Kang, H. Yang, B. Liu, S. Li, X. Zhang and F. Ran, *J Solid State Chem*, 2022, 309, 122994.
- [5] W. Wang, Y. Fang, S. Wang, Z. Zhang, R. Zhao and W. Xue, *Journal of Alloys and Compounds*, 2022, 900, 163532.

- [6] Z. Ma, J. Li, R. Ma, J. He, X. Song, Y. Yu, Y. Quan and G. Wang, *New J Chem*, 2022, 46, 7230-7241.
- [7] J. Acharya, B. Pant, G. Prasad Ojha and M. Park, *J Colloid Interf Sci*, 2022, 610, 863-878.
- [8] H. Li, X. Wang, L. Dai, F. Guo, H. Mi, C. Ji and L. Sun, *Inorg Chem*, 2022, 61, 3866-3874.
