# Supplementary figures and images for: In situ growth of binder-free CoNi0.5-MOF/CC electrode for high-performance flexible solid-state supercapacitor application
Source: Royal Society of Chemistry journal article supplement (doi:10.1039/d3nr06225b), 2024-01-01

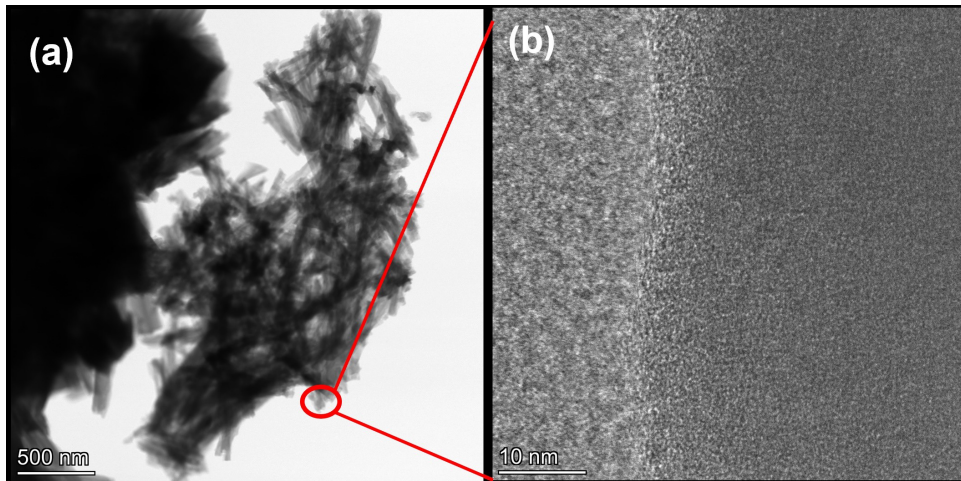

Supplement: d3nr06225b2.pdf [file d3nr06225b2.pdf]

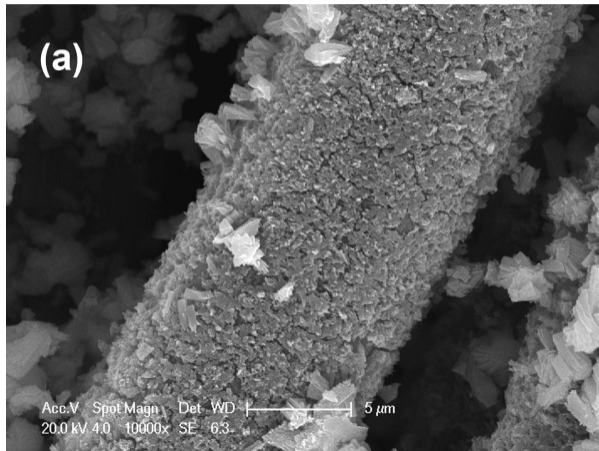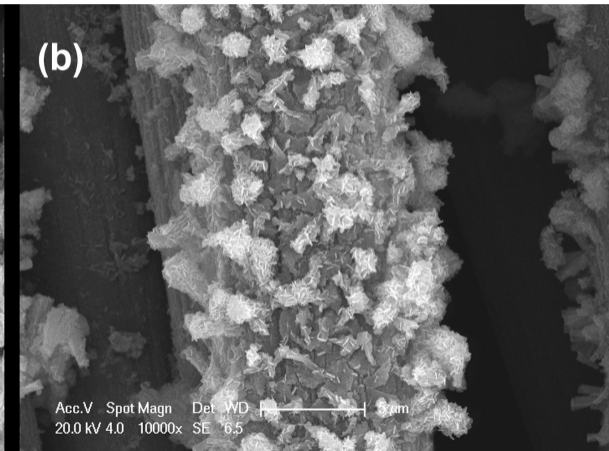

Supplement: d3nr06225b3.pdf [file d3nr06225b3.pdf]

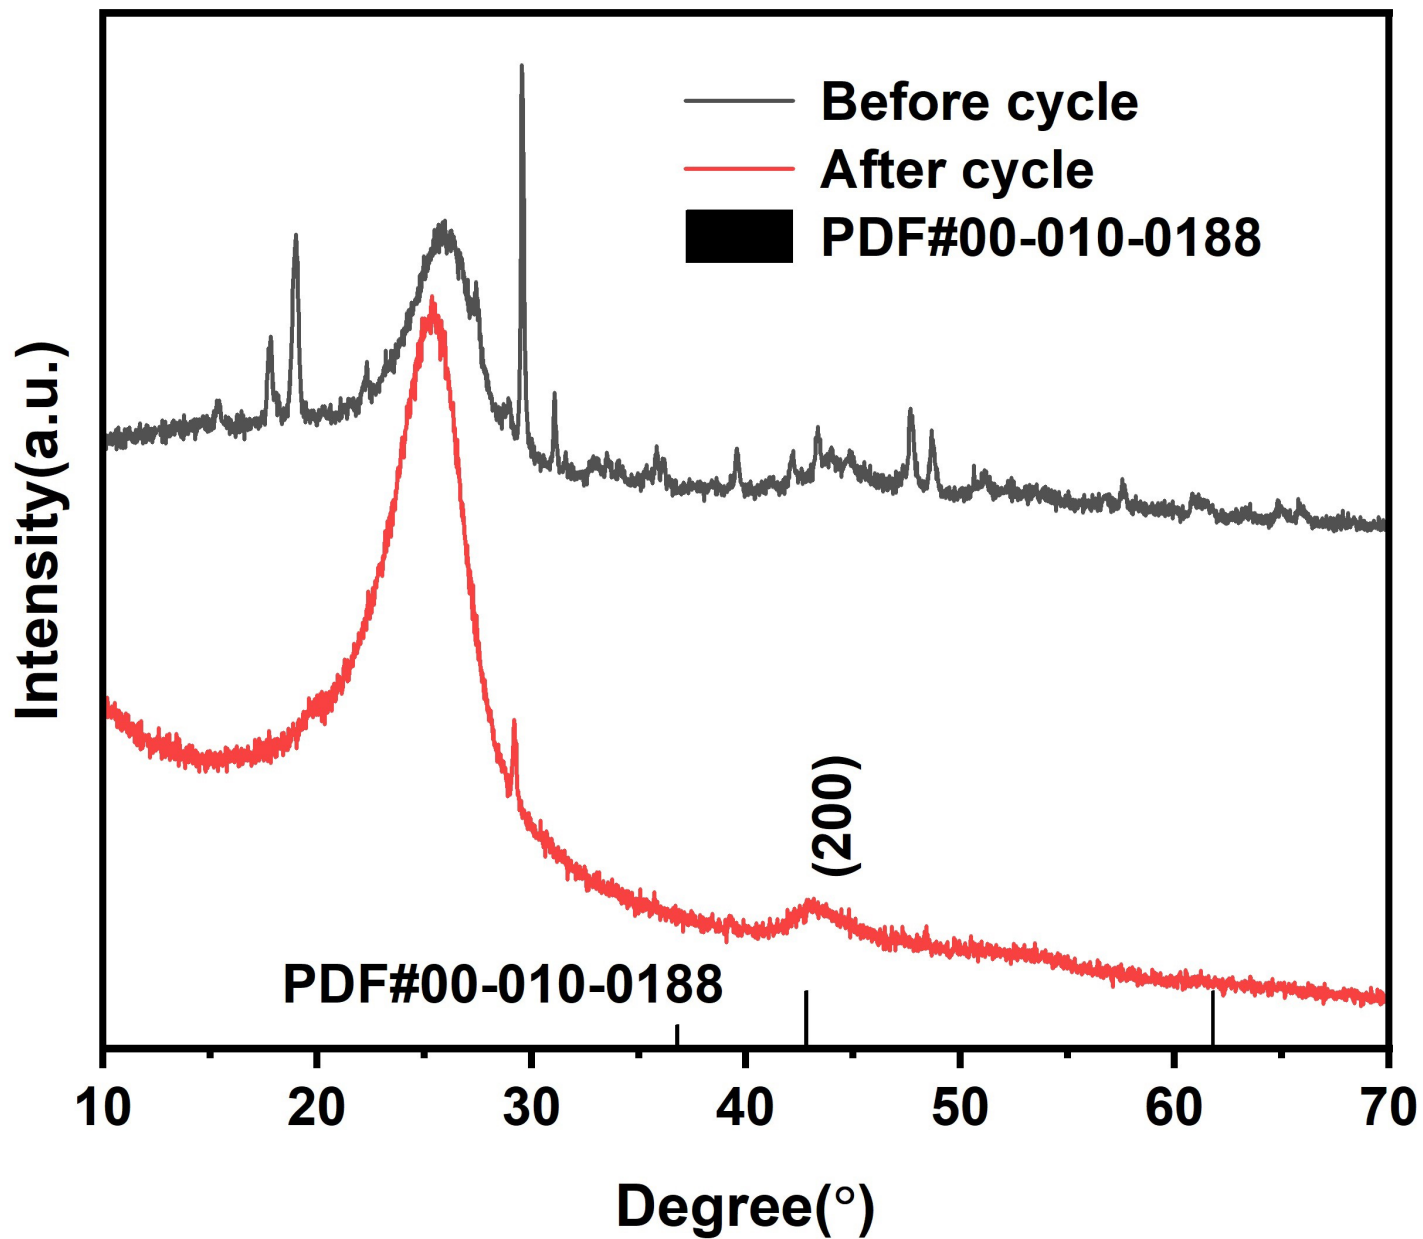

Supplement: d3nr06225b4.pdf [file d3nr06225b4.pdf]
